# Supplementary material for: Hydrologically transported dissolved organic carbon influences soil respiration in a tropical rainforest
Source: Copernicus journal article supplement (doi:10.5194/bg-13-5487-2016), 2016-10-04

Supplement of Biogeosciences, 13, 5487–5497, 2016  
<http://www.biogeosciences.net/13/5487/2016/>  
doi:10.5194/bg-13-5487-2016-supplement  
© Author(s) 2016. CC Attribution 3.0 License.

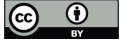

*Supplement of*

## **Hydrologically transported dissolved organic carbon influences soil respiration in a tropical rainforest**

**Wen-Jun Zhou et al.**

*Correspondence to:* Y.-P. Zhang (yipingzh@xtbg.ac.cn), L.-Q. Sha (shalq@xtbg.ac.cn)

The copyright of individual parts of the supplement might differ from the CC-BY 3.0 licence.

20 Supplementary figure captions:

21 Figure S1 Correlations between water and DOC concentration in the tropical rainforest at

22 Xishuangbanna, southwest China

23 A is the correlation between daily throughfall flux and DOC concentration

24 B is the correlation between daily litterleachate flux and DOC concentration

25 C is the correlation between daily soil water (0-20cm) flux and DOC concentration

26

27 Figure S2 Correlation between soil temperature and soil water content of CO<sub>2</sub> from eddy flux tower

28 explained during soil respiration observation plot from Feb. 2008 to Jan. 2009 (a), soil respiration and

29 temperature at 5 cm depth (b), and soil water content at 10 cm depth (c) in the tropical rainforest at

30 Xishuangbanna, southwest China

31

32 Figure S3 Rainfall (A), throughfall (B), litter leachate (C), and surface soil (0–20 cm) water (D)

33 dynamics in the tropical seasonal rainforest at Xishuangbanna, southwest China.

34 Fig.S1

35

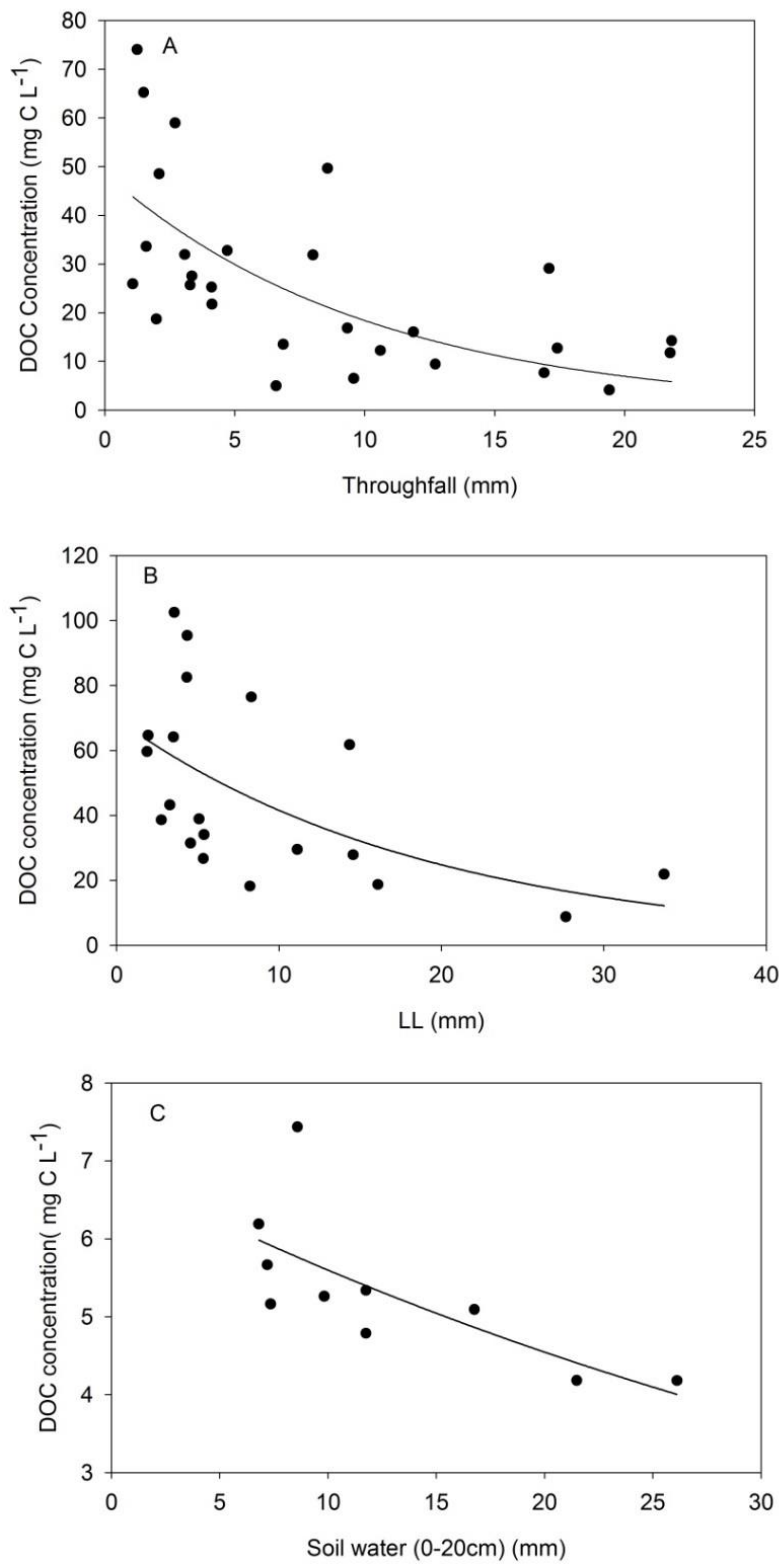

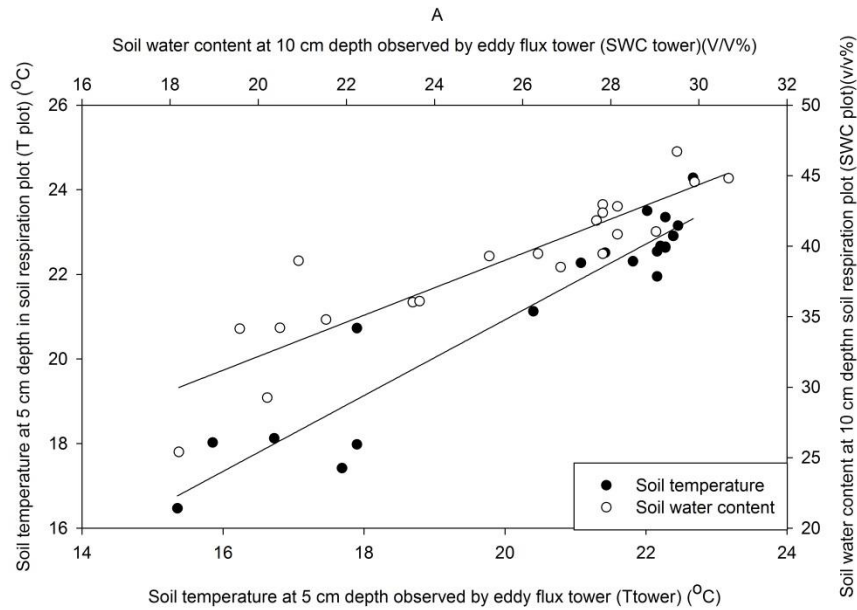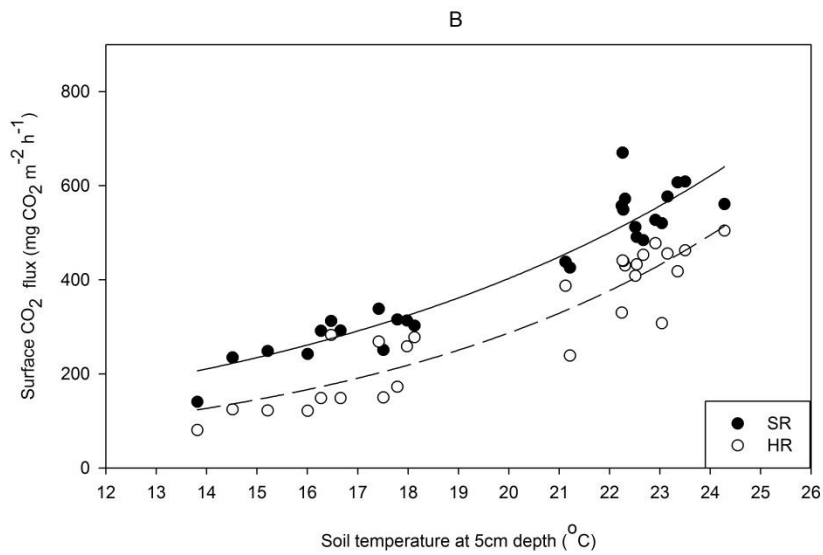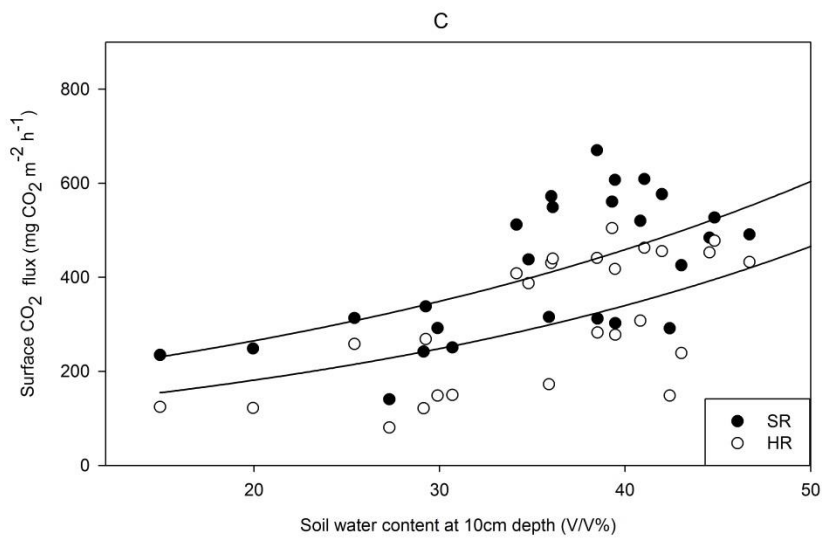

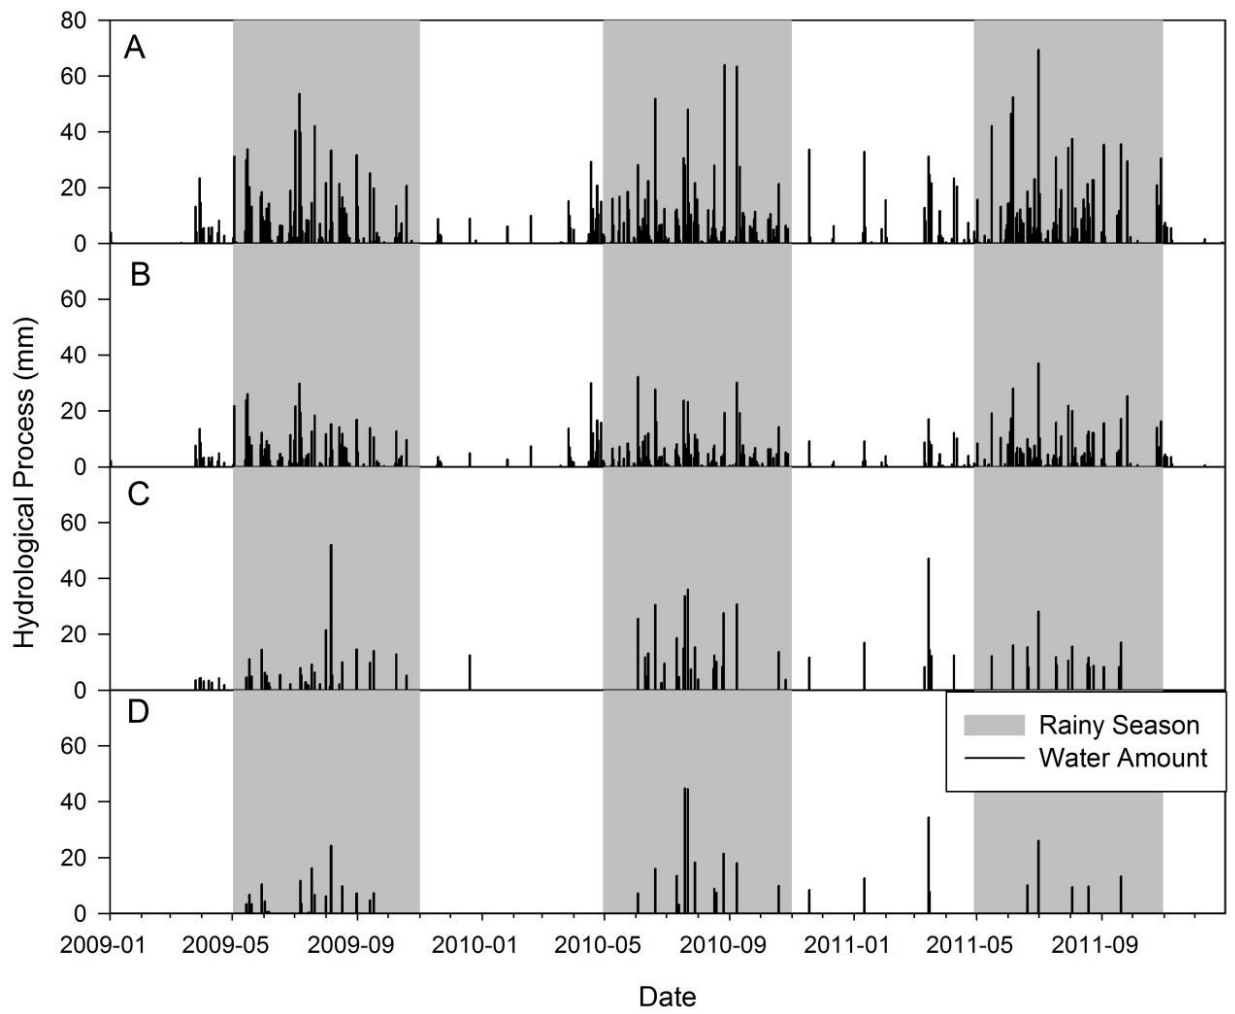

Supplement: Supplementary file 1 [file bg-13-5487-2016-supplement.pdf]
